# Supplementary material for: Genome-Wide Identification and Expression Analysis of Expansin Gene Family in the Storage Root Development of Diploid Wild Sweetpotato Ipomoea trifida
Source: MDPI journal article supplement (doi:10.3390/genes13061043), 2022-06-10
Supplement: s1 [file s1]

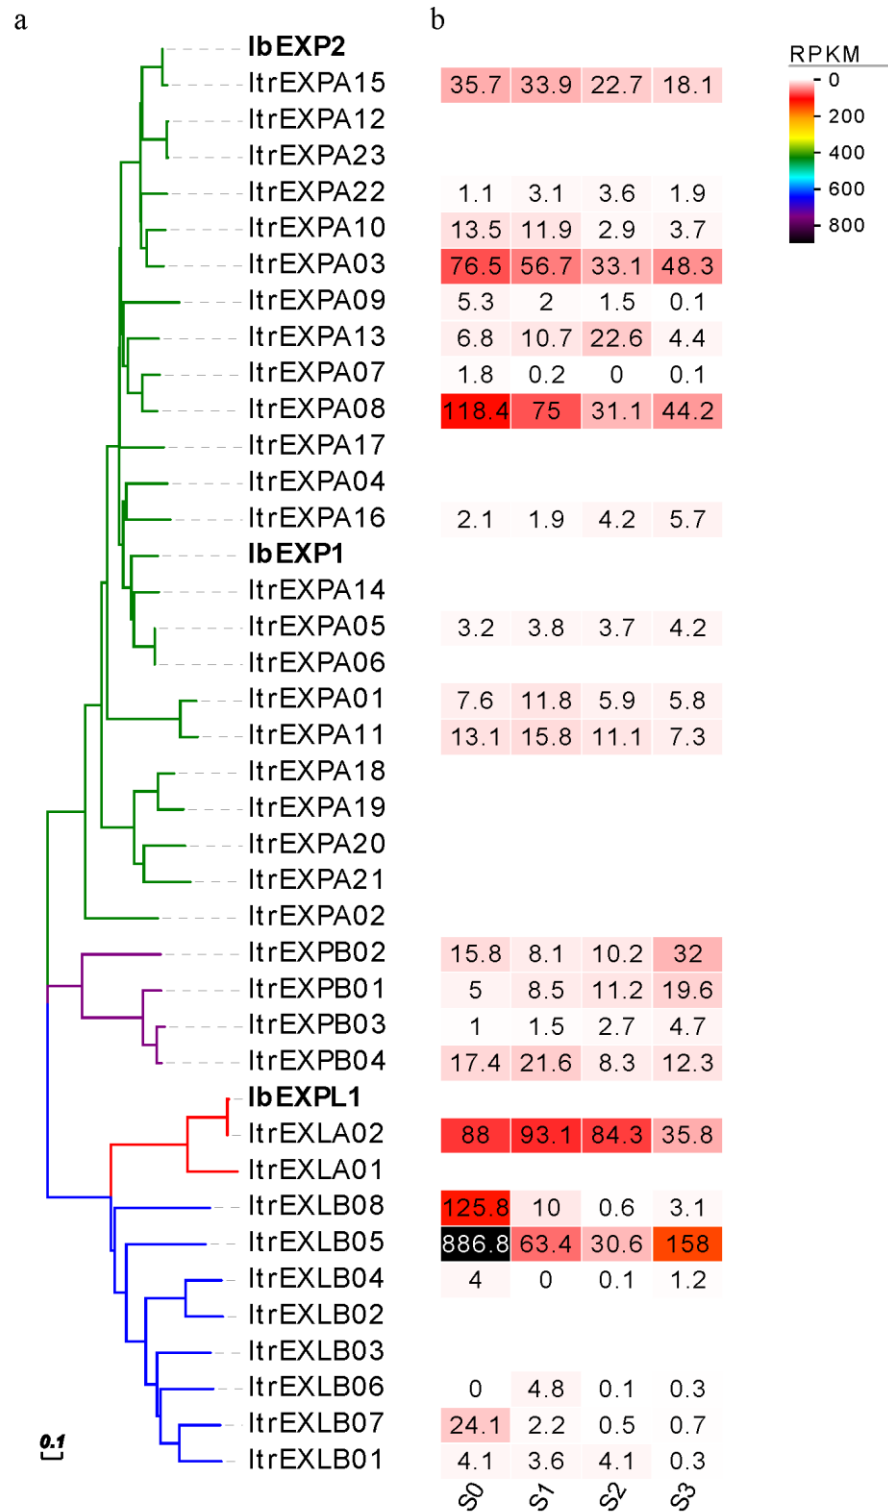

**Figure S1. The phylogenetic relationships of expansin proteins between sweetpotato and Y22.**

(a): The phylogenetic relationships between IbEXP1, IbEXP2, IbEXPL1 and Y22 expansin proteins. (b): The expression heatmap of the Y22 expansin genes (RPKM > 1).

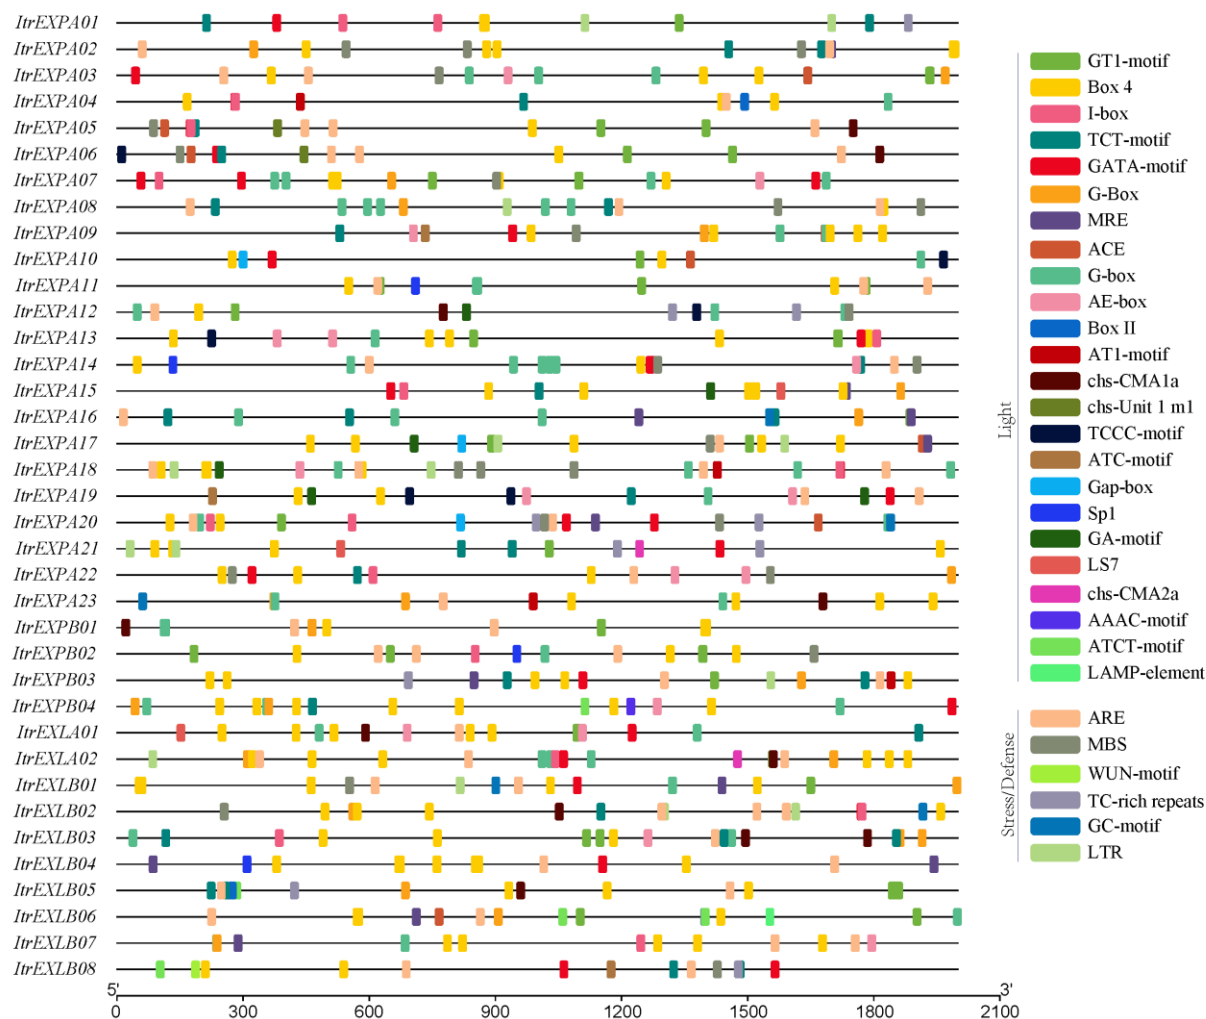

**Figure S2. Potential light and stress/defense *cis*-elements in the promoter region of expansin genes.** Left part showed the locations of *cis*-elements in the promoter regions, right part showed the *cis*-element types and their symbols.

**Table S1. The primer pairs of selected genes for qRT-PCR.**

| Gene Name        | Primer Name | 5'-3' sequence          | Products |
|------------------|-------------|-------------------------|----------|
| <i>ItrEXPA10</i> | F-PA10      | CTCGCCGTCCAAGCCAGAAT    | 120bp    |
|                  | R-PA10      | CCCATACCCACAAGCACCAC    |          |
| <i>ItrEXPA13</i> | F-PA13      | GCCCTCCGAACTATGCTTTGC   | 167bp    |
|                  | R-PA13      | CCTTATGCCTCCTTTCCTCACAC |          |
| <i>ItrEXPA03</i> | F-PA03      | TACGCCTTGCCTAATGACAATG  | 177bp    |
|                  | R-PA03      | CTAGGTTGAAGAAACGGTGGC   |          |
| <i>ItrEXPA15</i> | F-PA15      | TGTGGAGCCTGCTTTGAGATC   | 166bp    |
|                  | R-PA15      | GCATGGCGAGATCAAAATGCG   |          |
| <i>ItrEXPA09</i> | F-PA09      | ATCCAACGCATACCTAACGG    | 116bp    |
|                  | R-PA09      | CGAAAGTCTGCCCAAATCTCCAA |          |
| <i>ItrEXPA08</i> | F-PA08      | CAACACTTCGACATGGCTCAG   | 164bp    |
|                  | R-PA08      | CCAACGTTAGTCACCAACACC   |          |
| <i>ItrEXPB02</i> | F-PB02      | AGTGCATTTTCGACCTCAGCGG  | 185bp    |
|                  | R-PB02      | CCACCAAGAGTGAAAGCCAGAA  |          |
| <i>ItrEXPB03</i> | F-PB03      | ATGCTCGGGAAAGGCAGTGAC   | 127bp    |
|                  | R-PB03      | CTGGTCAGCTTTGCCGGAAGA   |          |
| <i>ItrEXLA02</i> | F-LA02      | CTGCGTCCACCAAACCAAAGTC  | 116bp    |
|                  | R-LA02      | CTGCGGCAGCAAGATGTCCT    |          |
| <i>ItrEXLB05</i> | F-LB05      | GGAGCTTGTGGGTTTGGTGAC   | 151bp    |
|                  | R-LB05      | TCCTCGTACCTTCCTCGTTGC   |          |
| <i>ItrEXLB08</i> | F-LB08      | GTCTTGCAGTTCTCATAGGGAC  | 127bp    |
|                  | R-LB08      | CTATCTGTGCCATTGTCATCGG  |          |

**Table S2. The expansin genes of *I. nil* and *I. triloba*.**

| <i>I. nil</i>    |                   | <i>I. triloba</i> |                   |
|------------------|-------------------|-------------------|-------------------|
| Gene Name        | Gene ID           | Gene Name         | Gene ID           |
| <i>IniEXPA01</i> | gene-LOC109162042 | <i>IlbEXPA01</i>  | gene-LOC115998052 |
| <i>IniEXPA02</i> | gene-LOC109166240 | <i>IlbEXPA02</i>  | gene-LOC116025128 |
| <i>IniEXPA03</i> | gene-LOC109189038 | <i>IlbEXPA03</i>  | gene-LOC116020824 |
| <i>IniEXPA04</i> | gene-LOC109193479 | <i>IlbEXPA04</i>  | gene-LOC115999375 |
| <i>IniEXPA05</i> | gene-LOC109154062 | <i>IlbEXPA05</i>  | gene-LOC116000481 |
| <i>IniEXPA06</i> | gene-LOC109154072 | <i>IlbEXPA06</i>  | gene-LOC115999911 |
| <i>IniEXPA07</i> | gene-LOC109154073 | <i>IlbEXPA07</i>  | gene-LOC116007517 |
| <i>IniEXPA08</i> | gene-LOC109181060 | <i>IlbEXPA08</i>  | gene-LOC116003819 |
| <i>IniEXPA09</i> | gene-LOC109173867 | <i>IlbEXPA09</i>  | gene-LOC116013951 |
| <i>IniEXPA10</i> | gene-LOC109186551 | <i>IlbEXPA10</i>  | gene-LOC116020110 |
| <i>IniEXPA11</i> | gene-LOC109154973 | <i>IlbEXPA11</i>  | gene-LOC116019994 |
| <i>IniEXPA12</i> | gene-LOC109154972 | <i>IlbEXPA12</i>  | gene-LOC115998007 |
| <i>IniEXPA13</i> | gene-LOC109157987 | <i>IlbEXPA13</i>  | gene-LOC116030898 |
| <i>IniEXPA14</i> | gene-LOC109159018 | <i>IlbEXPA14</i>  | gene-LOC116017466 |
| <i>IniEXPA15</i> | gene-LOC109148147 | <i>IlbEXPA15</i>  | gene-LOC116003780 |
| <i>IniEXPA16</i> | gene-LOC109186601 | <i>IlbEXPA16</i>  | gene-LOC115999171 |
| <i>IniEXPA17</i> | gene-LOC109192973 | <i>IlbEXPA17</i>  | gene-LOC116011772 |
| <i>IniEXPA18</i> | gene-LOC109173472 | <i>IlbEXPA18</i>  | gene-LOC116022872 |
| <i>IniEXPA19</i> | gene-LOC109149167 | <i>IlbEXPA19</i>  | gene-LOC116027442 |
| <i>IniEXPA20</i> | gene-LOC109152686 | <i>IlbEXPA20</i>  | gene-LOC116026901 |
| <i>IniEXPA21</i> | gene-LOC109183517 | <i>IlbEXPA21</i>  | gene-LOC116001114 |
| <i>IniEXPA22</i> | gene-LOC109168111 | <i>IlbEXPA22</i>  | gene-LOC116012277 |
| <i>IniEXPA23</i> | gene-LOC109188880 | <i>IlbEXPA23</i>  | gene-LOC115998240 |
| <i>IniEXPA24</i> | gene-LOC109167477 | <i>IlbEXPA24</i>  | gene-LOC116003784 |
| <i>IniEXPA25</i> | gene-LOC109177514 | <i>IlbEXPA25</i>  | gene-LOC116030964 |
| <i>IniEXPA26</i> | gene-LOC109188155 | <i>IlbEXPA26</i>  | gene-LOC116028302 |
| <i>IniEXPA27</i> | gene-LOC109153624 | <i>IlbEXPA27</i>  | gene-LOC116030858 |
| <i>IniEXPA28</i> | gene-LOC109153727 | <i>IlbEXPB01</i>  | gene-LOC116008214 |
| <i>IniEXPA29</i> | gene-LOC109191378 | <i>IlbEXPB02</i>  | gene-LOC116017748 |
| <i>IniEXPA30</i> | gene-LOC109153593 | <i>IlbEXPB03</i>  | gene-LOC116014045 |
| <i>IniEXPA31</i> | gene-LOC109153631 | <i>IlbEXPB04</i>  | gene-LOC116014258 |
| <i>IniEXPB01</i> | gene-LOC109188048 | <i>IlbEXPB05</i>  | gene-LOC116014428 |
| <i>IniEXPB02</i> | gene-LOC109186602 | <i>IlbEXPB06</i>  | gene-LOC116014343 |
| <i>IniEXPB03</i> | gene-LOC109186593 | <i>IlbEXLA01</i>  | gene-LOC116019640 |
| <i>IniEXPB04</i> | gene-LOC109193325 | <i>IlbEXLA02</i>  | gene-LOC116029340 |
| <i>IniEXPB05</i> | gene-LOC109193328 | <i>IlbEXLB01</i>  | gene-LOC116028927 |
| <i>IniEXPB06</i> | gene-LOC109193326 | <i>IlbEXLB02</i>  | gene-LOC116002815 |
| <i>IniEXPB07</i> | gene-LOC109193320 | <i>IlbEXLB03</i>  | gene-LOC115997228 |
| <i>IniEXLA01</i> | gene-LOC109161325 | <i>IlbEXLB04</i>  | gene-LOC116001079 |
| <i>IniEXLB01</i> | gene-LOC109174806 | <i>IlbEXLB05</i>  | gene-LOC116001309 |
| <i>IniEXLB02</i> | gene-LOC109177426 | <i>IlbEXLB06</i>  | gene-LOC116028391 |

**Table S2. The expansin genes of *I. nil* and *I. triloba* (continued).**

| <i>I. nil</i>    |                   | <i>I. triloba</i> |                   |
|------------------|-------------------|-------------------|-------------------|
| Gene Name        | Gene ID           | Gene Name         | Gene ID           |
| <i>IniEXLB03</i> | gene-LOC109174872 | <i>IlbEXLB07</i>  | gene-LOC116001078 |
| <i>IniEXLB04</i> | gene-LOC109185131 | <i>IlbEXLB08</i>  | gene-LOC116002898 |
| <i>IniEXLB05</i> | gene-LOC109185314 | <i>IlbEXLB09</i>  | gene-LOC116030832 |
| <i>IniEXLB06</i> | gene-LOC109174855 | <i>IlbEXLB10</i>  | gene-LOC116030871 |
| <i>IniEXLB07</i> | gene-LOC109174854 |                   |                   |

The expansin genes were identified by the same pipeline as that used for Y22.

**Table S3. The duplication type of expansin genes in Y22 genome.**

| Subfamily | Gene Name        | Gene Id              | Code | Type of duplication |
|-----------|------------------|----------------------|------|---------------------|
| EXPA      | <i>ItrEXPA01</i> | Itr.Sc0000011.164    | 4    | WGD or segmental    |
| EXPA      | <i>ItrEXPA02</i> | Itr.xfSc0000576.12   | 4    | WGD or segmental    |
| EXPA      | <i>ItrEXPA03</i> | Itr.Sc0000007.290    | 4    | WGD or segmental    |
| EXPA      | <i>ItrEXPA04</i> | Itr.Sc0000051.50     | 4    | WGD or segmental    |
| EXPA      | <i>ItrEXPA05</i> | Itr.Sc0000046.34     | 4    | WGD or segmental    |
| EXPA      | <i>ItrEXPA06</i> | Itr.Sc0000046.36     | 3    | Tandem              |
| EXPA      | <i>ItrEXPA07</i> | Itr.xfSc0000007.14   | 4    | WGD or segmental    |
| EXPA      | <i>ItrEXPA08</i> | Itr.xfSc0000007.15   | 3    | Tandem              |
| EXPA      | <i>ItrEXPA09</i> | Itr.Sc0000078.10     | 4    | WGD or segmental    |
| EXPA      | <i>ItrEXPA10</i> | Itr.Sc0000001.78     | 2    | Proximal            |
| EXPA      | <i>ItrEXPA11</i> | Itr.xfSc0000049.46   | 4    | WGD or segmental    |
| EXPA      | <i>ItrEXPA12</i> | Itr.Sc0000003.235    | 4    | WGD or segmental    |
| EXPA      | <i>ItrEXPA13</i> | Itr.Sc0000003.134    | 4    | WGD or segmental    |
| EXPA      | <i>ItrEXPA14</i> | Itr.Sc0000025.53     | 4    | WGD or segmental    |
| EXPA      | <i>ItrEXPA15</i> | Itr.Sc0000014.125    | 4    | WGD or segmental    |
| EXPA      | <i>ItrEXPA16</i> | Itr.Sc0000087.3      | 4    | WGD or segmental    |
| EXPA      | <i>ItrEXPA17</i> | Itr.Sc0000013.190    | 4    | WGD or segmental    |
| EXPA      | <i>ItrEXPA18</i> | Itr.xpSc0079065.36   | 4    | WGD or segmental    |
| EXPA      | <i>ItrEXPA19</i> | Itr.xpSc0079065.38   | 3    | Tandem              |
| EXPA      | <i>ItrEXPA20</i> | Itr.xpSc0079065.39   | 3    | Tandem              |
| EXPA      | <i>ItrEXPA21</i> | Itr.xpSc0079065.40   | 3    | Tandem              |
| EXPA      | <i>ItrEXPA22</i> | Itr.xfSc0000000.33   | 4    | WGD or segmental    |
| EXPA      | <i>ItrEXPA23</i> | Itr.xfSc0001203.1    | 1    | Dispersed           |
| EXPB      | <i>ItrEXPB01</i> | Itr.xfSc0000185.16   | 4    | WGD or segmental    |
| EXPB      | <i>ItrEXPB02</i> | Itr.Sc0000024.30     | 4    | WGD or segmental    |
| EXPB      | <i>ItrEXPB03</i> | Itr.xfSc0000047.33   | 4    | WGD or segmental    |
| EXPB      | <i>ItrEXPB04</i> | Itr.xfSc0001448.1    | 1    | Dispersed           |
| EXLA      | <i>ItrEXLA01</i> | Itr.Sc0000050.70     | 4    | WGD or segmental    |
| EXLA      | <i>ItrEXLA02</i> | Itr.Sc0000020.14     | 4    | WGD or segmental    |
| EXLB      | <i>ItrEXLB01</i> | Itr.xpSc0079072.22   | 4    | WGD or segmental    |
| EXLB      | <i>ItrEXLB02</i> | Itr.xfSc0000061.14   | 4    | WGD or segmental    |
| EXLB      | <i>ItrEXLB03</i> | Itr.xfSc0000061.13   | 3    | Tandem              |
| EXLB      | <i>ItrEXLB04</i> | Itr.xfSc0000239.16   | 1    | Dispersed           |
| EXLB      | <i>ItrEXLB05</i> | Itr.Sc0000071.6      | 4    | WGD or segmental    |
| EXLB      | <i>ItrEXLB06</i> | Itr.xfSc0000002.83.1 | 4    | WGD or segmental    |
| EXLB      | <i>ItrEXLB07</i> | Itr.xfSc0000002.86   | 3    | Tandem              |
| EXLB      | <i>ItrEXLB08</i> | Itr.xfSc0000002.103  | 4    | WGD or segmental    |

Comparative genomic analysis revealed that the WGT occurred in an ancient ancestor of *Ipomoea* [23, 24], therefore the "WGD" in this table was the WGD or WGT.

**Table S4. Collinearity result of expansin genes between *C. canephora* and Y22 genome.**

| Location     | <i>C. canephora</i> Genes | <i>I. trifida</i> Genes |                  |                  |                  |                  |
|--------------|---------------------------|-------------------------|------------------|------------------|------------------|------------------|
|              |                           | iter=1                  | iter=2           | iter=3           | iter=4           | iter=5           |
| chr1         | gene-GSCOC_T00028253001   | <i>ItrEXPA15</i>        | <i>ItrEXPA12</i> |                  | <i>ItrEXPA10</i> |                  |
| chr1         | gene-GSCOC_T00016583001   |                         | <i>ItrEXPA13</i> | <i>ItrEXPA17</i> |                  |                  |
| chr2         | gene-GSCOC_T00028856001   |                         |                  |                  |                  |                  |
| chr2         | gene-GSCOC_T00028854001   |                         |                  |                  |                  |                  |
| chr2         | gene-GSCOC_T00029906001   | <i>ItrEXPA03</i>        | <i>ItrEXPA10</i> |                  | <i>ItrEXPA12</i> |                  |
| chr4         | gene-GSCOC_T00035723001   | <i>ItrEXPA04</i>        |                  |                  |                  |                  |
| chr5         | gene-GSCOC_T00042204001   | <i>ItrEXPB02</i>        |                  |                  |                  |                  |
| chr6         | gene-GSCOC_T00023514001   |                         | <i>ItrEXPA22</i> |                  | <i>ItrEXPA15</i> | <i>ItrEXPA12</i> |
| chr6         | gene-GSCOC_T00042971001   |                         | <i>ItrEXPA18</i> |                  |                  |                  |
| chr7         | gene-GSCOC_T00039583001   |                         |                  |                  |                  |                  |
| chr7         | gene-GSCOC_T00036829001   |                         | <i>ItrEXPA11</i> |                  |                  |                  |
| chr8         | gene-GSCOC_T00027140001   |                         |                  | <i>ItrEXLB03</i> |                  |                  |
| chr8         | gene-GSCOC_T00027139001   |                         |                  | <i>ItrEXLB03</i> |                  |                  |
| chr8         | gene-GSCOC_T00027142001   | <i>ItrEXLB06</i>        |                  | <i>ItrEXLB03</i> |                  |                  |
| chr8         | gene-GSCOC_T00027143001   | <i>ItrEXLB07</i>        |                  | <i>ItrEXLB03</i> |                  |                  |
| chr8         | gene-GSCOC_T00000261001   | <i>ItrEXLB08</i>        |                  |                  |                  |                  |
| chr8         | gene-GSCOC_T00037639001   | <i>ItrEXLB08</i>        |                  |                  |                  |                  |
| chr8         | gene-GSCOC_T00030309001   |                         |                  |                  |                  |                  |
| chr8         | gene-GSCOC_T00027141001   |                         |                  | <i>ItrEXLB02</i> |                  |                  |
| chr9         | gene-GSCOC_T00041034001   | <i>ItrEXLA02</i>        |                  |                  |                  |                  |
| chr10        | gene-GSCOC_T00024595001   |                         | <i>ItrEXPA09</i> |                  |                  |                  |
| scaffold_368 | gene-GSCOC_T00003973001   |                         |                  |                  |                  |                  |

All of the identified expansin genes of *C. canephora* are shown in this table; the term 'iter' was the software parameter.

**Table S5. The protein sequences of different conserved motifs.**

| Motif | Length | Motif Consensus                    | PFAM Domain     |
|-------|--------|------------------------------------|-----------------|
| 1     | 21     | ALSTALFNNGLSGACYEVKC               | DPBB_1          |
| 2     | 15     | WIPMSRNWGQNWETN                    | Pollen_allerg_1 |
| 3     | 15     | AGIVPVEYRRVPCKK                    | DPBB_1          |
| 4     | 23     | AHATFYGGSDASGTMGGACGYGN            | DPBB_1          |
| 5     | 27     | DNGGWCNPPRPHFDLSMPAFLKIAQYR        | DPBB_1          |
| 6     | 29     | KGGIRFTINGHRYFNLVLVTNVGGAGDVH      |                 |
| 7     | 29     | LSFRVTTSDGRTVTSYNVAPANWQFGQTF      |                 |
| 8     | 21     | GPGSITVTATNFCPPNYALPN              | DPBB_1          |
| 9     | 11     | LYSQGYGTNTA                        |                 |
| 10    | 15     | TDFILSYTAFGKMAK                    | DPBB_1          |
| 11    | 21     | KENALCSEKGVKVVITDEGEG              | DPBB_1          |
| 12    | 21     | KILDSSSNPNYLAIVILNQGG              | Pollen_allerg_1 |
| 13    | 21     | SSKNAIPADWKAGVTIDTGIQ              |                 |
| 14    | 8      | VSIKGSRT                           |                 |
| 15    | 34     | WKEAHATYYGPPEGTIGGACGFEEYKQTYSPYTA | DPBB_1          |
